# Supplementary material for: Landscape Preferences of Visitors to the Danube Floodplains National Park, Vienna
Source: MDPI journal article supplement (doi:10.3390/w13162178), 2021-08-09

## Trail 1 (1)

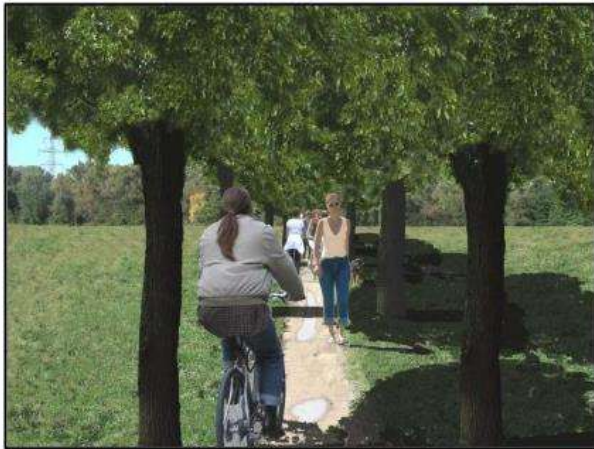

No view of water bodies along the way

Large dog zone with seating opportunities & drinking water

Public transport stop accessible within 10 min walking distance

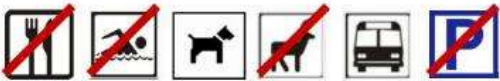

## Trail 3 (3)

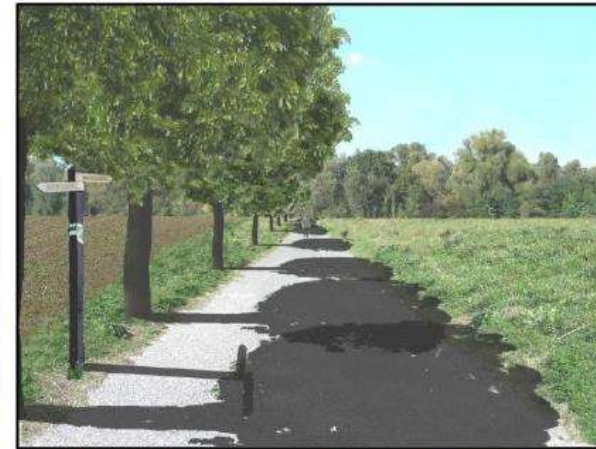

View of this water body along the way

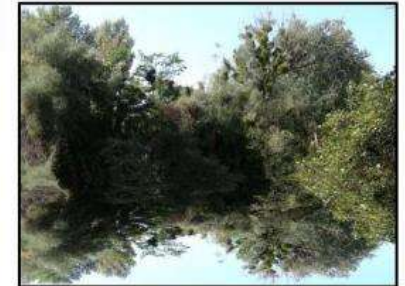

Large dog zone with seating opportunities & drinking water

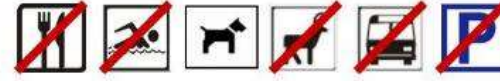

## Trail 2 (2)

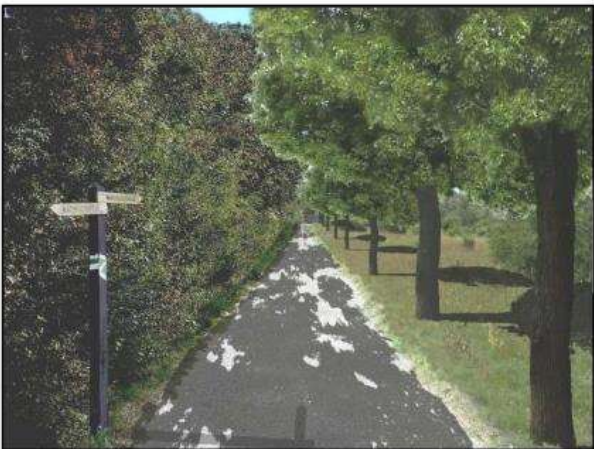

View of this water body along the way

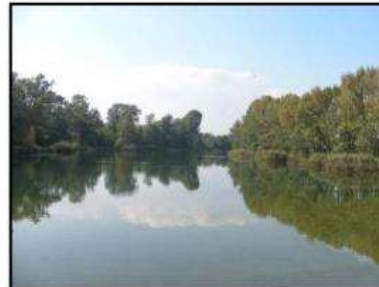

Small restaurant with beer garden

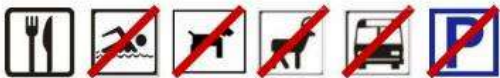

## Trail 4 (4)

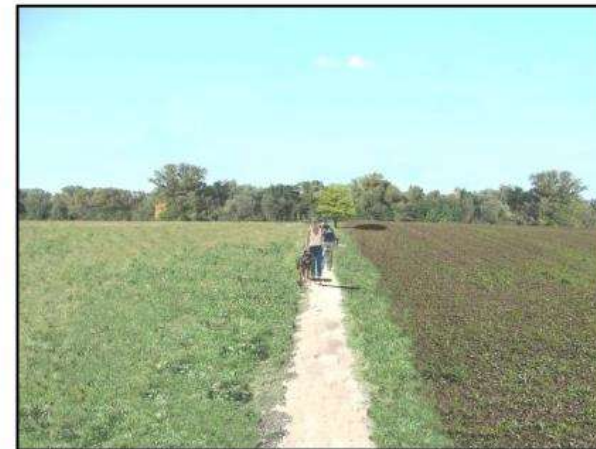

No view of water bodies along the way

Wildlife enclosure

Parking lot accessible within 10 min walking distance

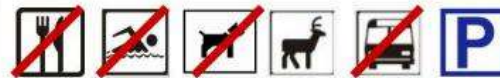



### Trail 1 (5)

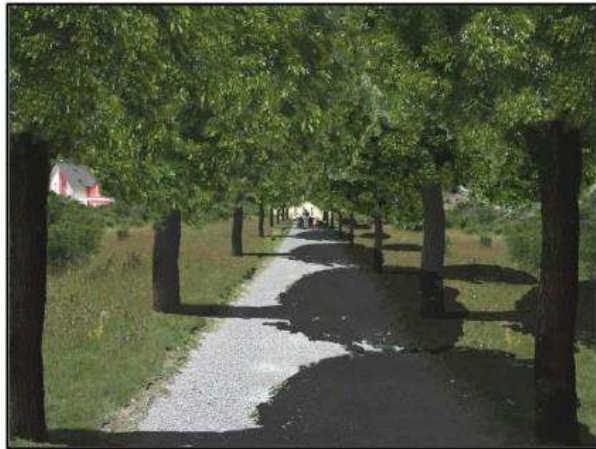

View of this water body along the way

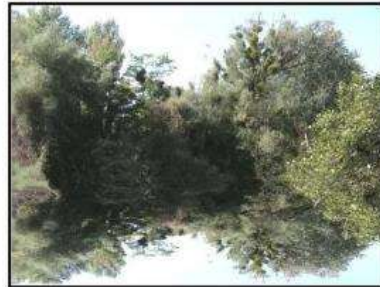

Small restaurant with beer garden

Parking lot accessible within 10 min walking distance

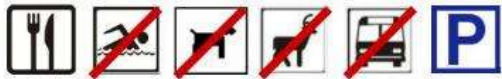

### Trail 3 (7)

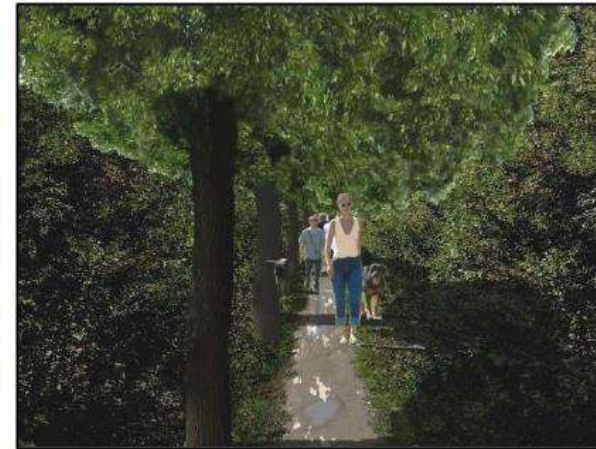

View of this water body along the way

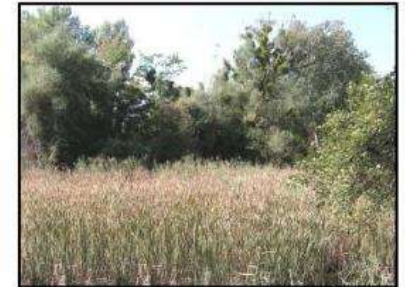

Small restaurant with beer garden

Public transport stop accessible within 10 min walking distance

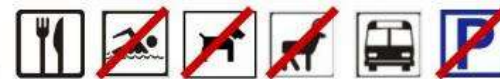

### Trail 2 (6)

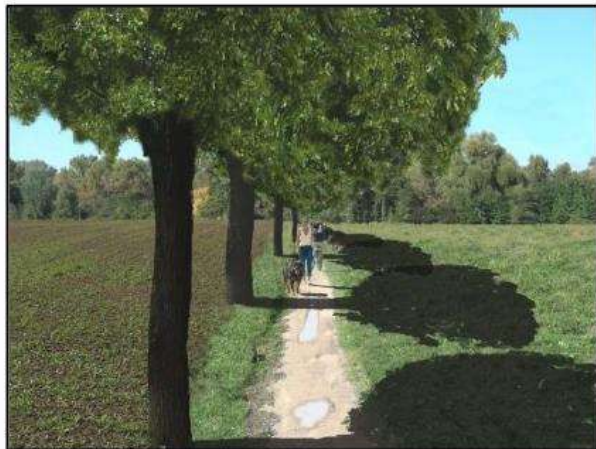

View of this water body along the way

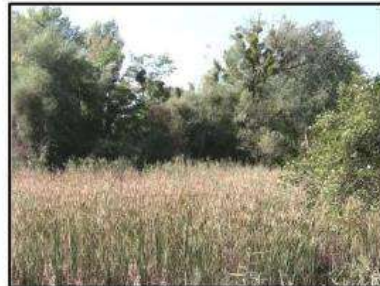

Large dog zone with seating opportunities & drinking water

Public transport stop accessible within 10 min walking distance

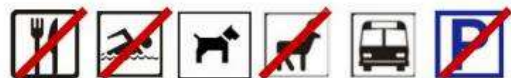

### Trail 4 (8)

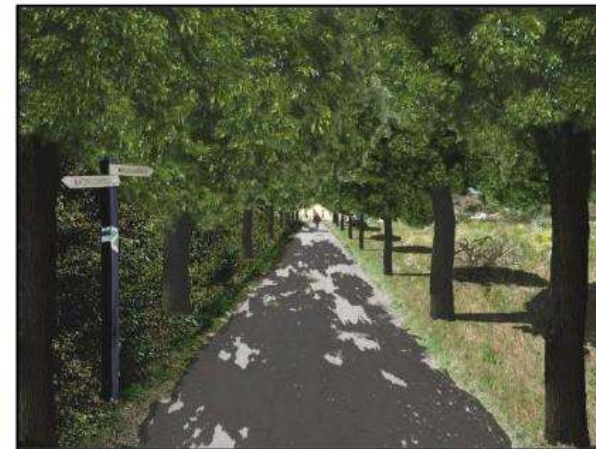

View of this water body along the way

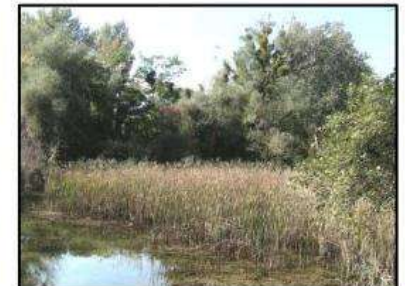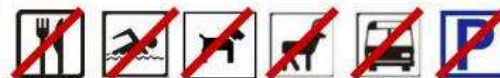



### Trail 1 (9)

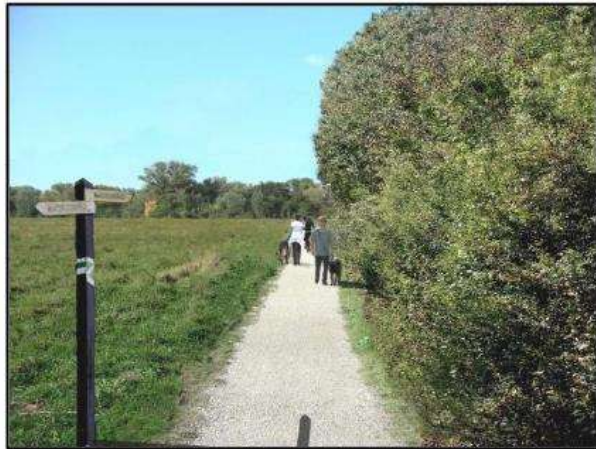

View of this water body along the way

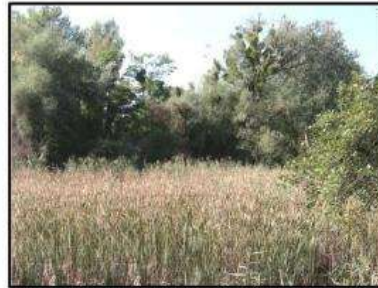

Large dog zone with seating opportunities & drinking water

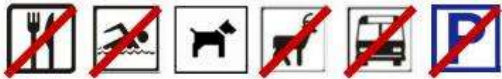

### Trail 3 (11)

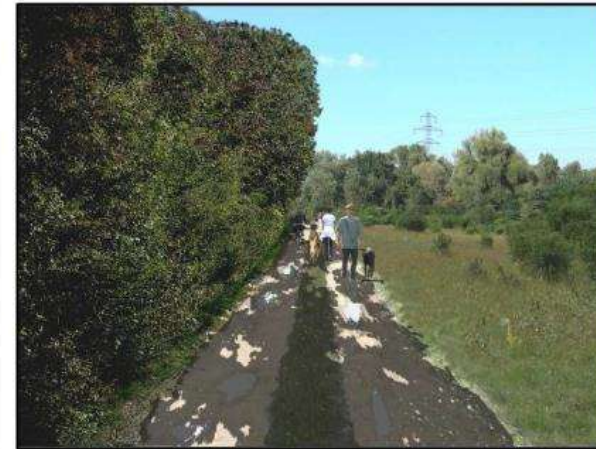

View of this water body along the way

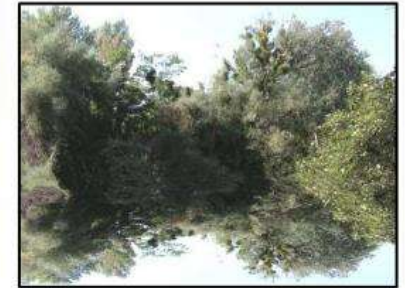

Natural swimming area with sunbathing area

Parking lot accessible within 10 min walking distance

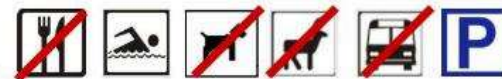

### Trail 2 (10)

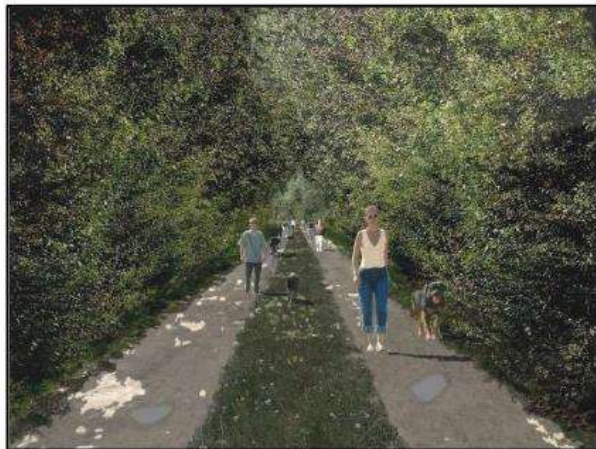

View of this water body along the way

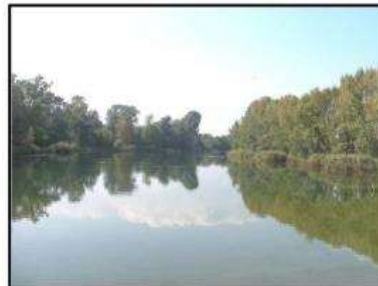

Public transport stop accessible within 10 min walking distance

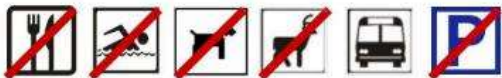

### Trail 4 (12)

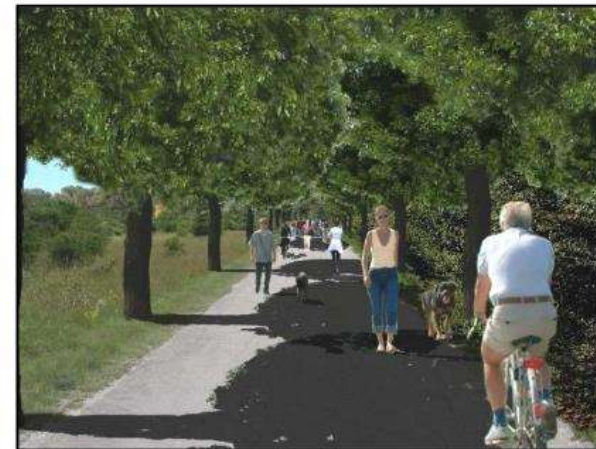

View of this water body along the way

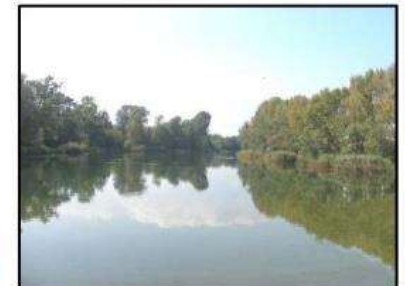

Large dog zone with seating opportunities & drinking water

Public transport stop accessible within 10 min walking distance

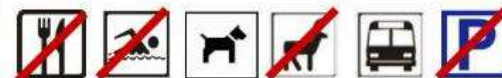



### Trail 1 (13)

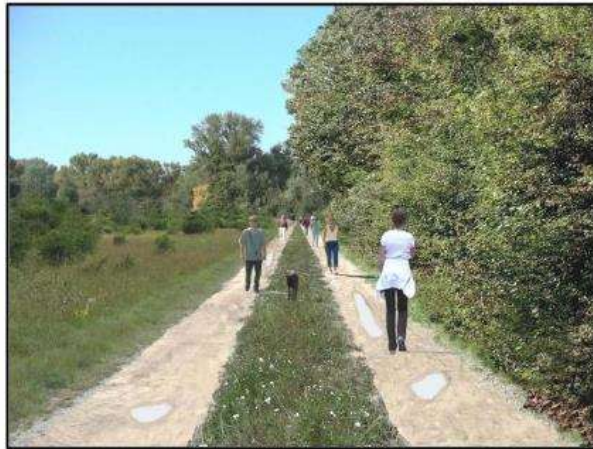

View of this water body along the way

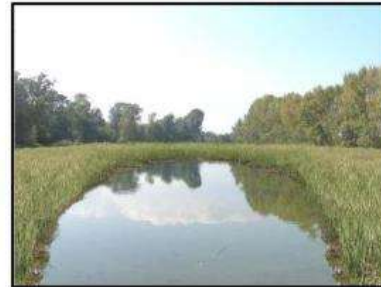

Small restaurant with beer garden

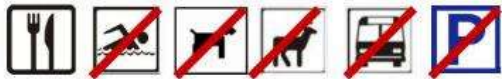

### Trail 3 (15)

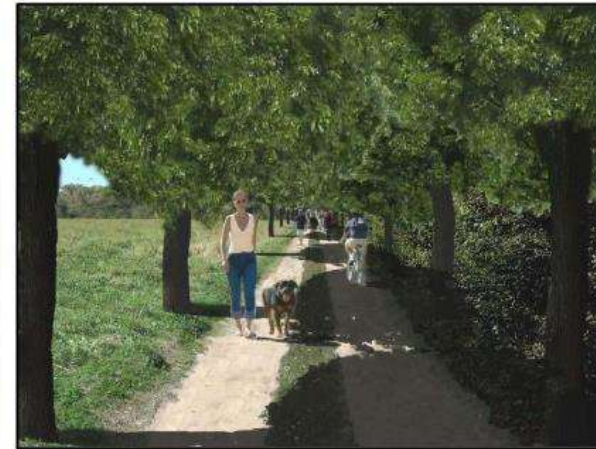

No view of water bodies along the way

Wildlife enclosure

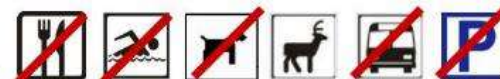

### Trail 2 (14)

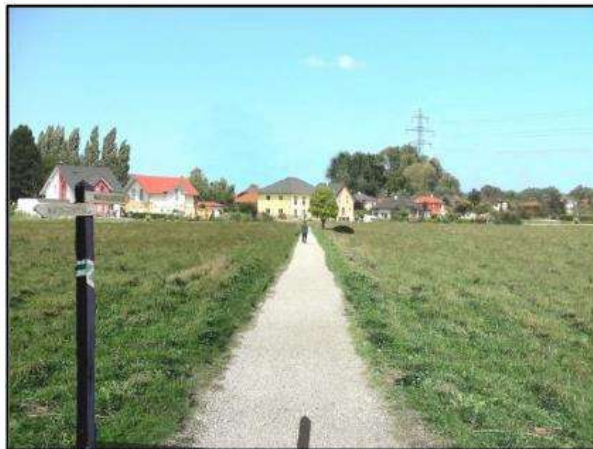

View of this water body along the way

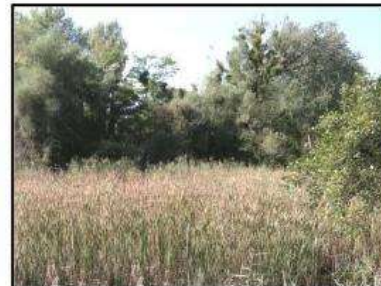

Natural swimming area with sunbathing area

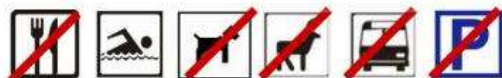

### Trail 4 (16)

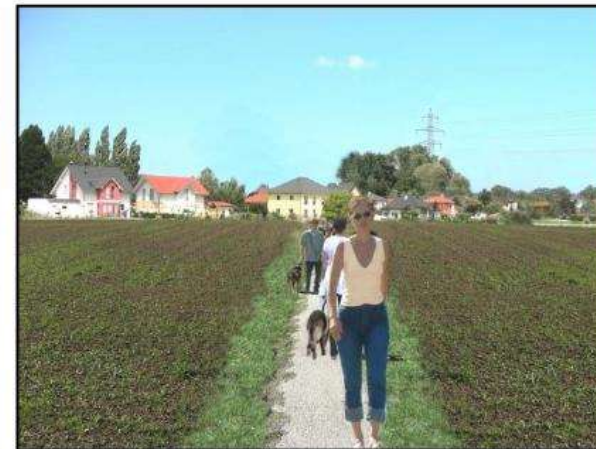

No view of water bodies along the way

Large dog zone with seating opportunities & drinking water

Parking lot accessible within 10 min walking distance

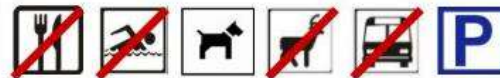



## Trail 1 (17)

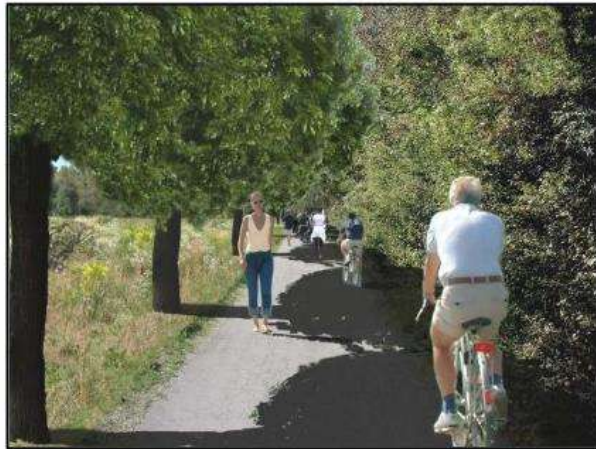

View of this water body along the way

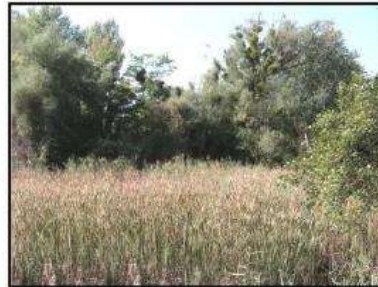

Natural swimming area with sunbathing area

Public transport stop accessible within 10 min walking distance

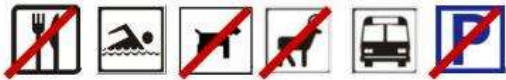

## Trail 3 (19)

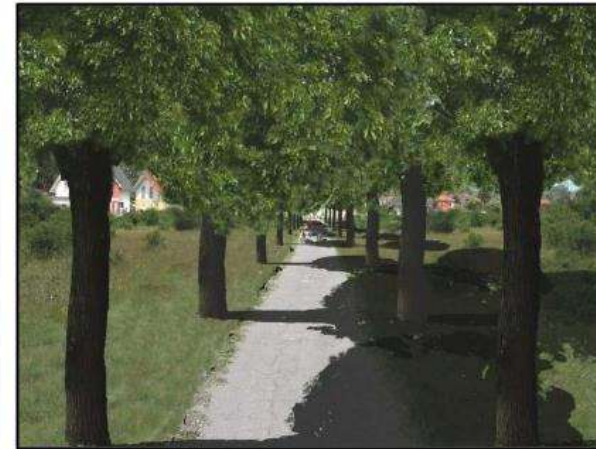

View of this water body along the way

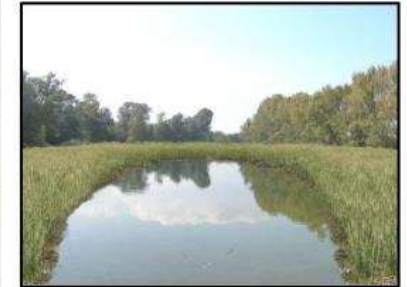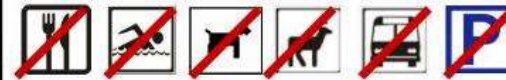

## Trail 2 (18)

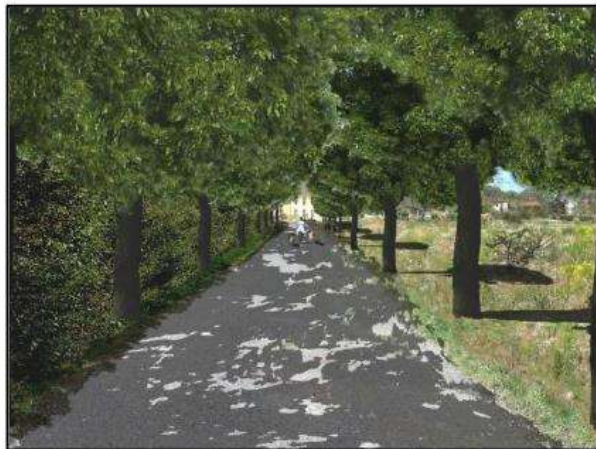

No view of water bodies along the way

Large dog zone with seating opportunities & drinking water

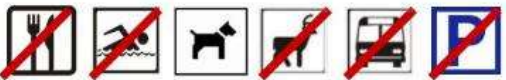

## Trail 4 (20)

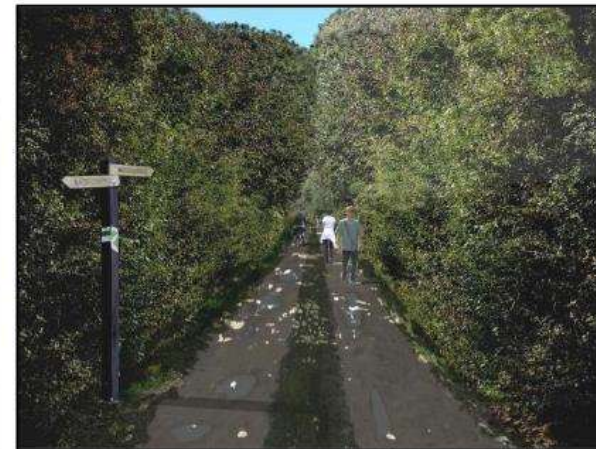

View of this water body along the way

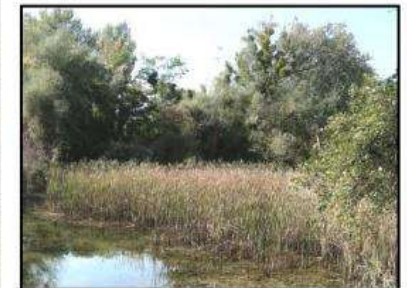

Small restaurant with beer garden

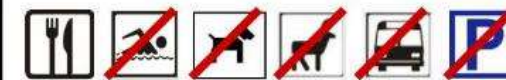



## Trail 1 (21)

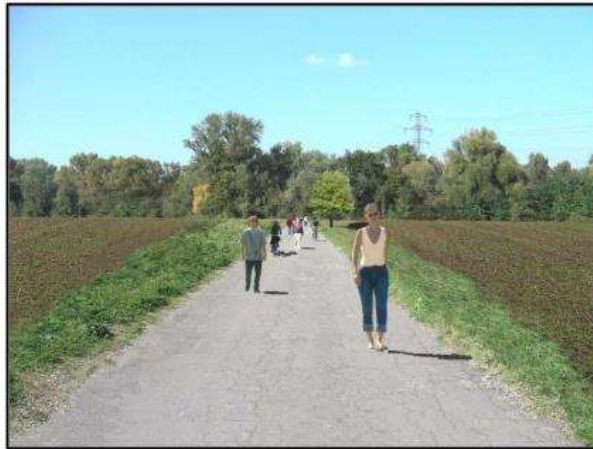

View of this water body along the way

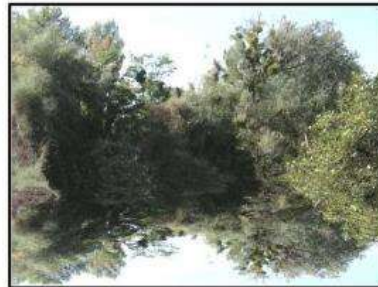

Natural swimming area with sunbathing area

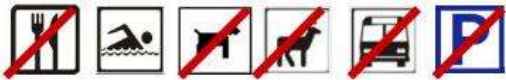

## Trail 3 (23)

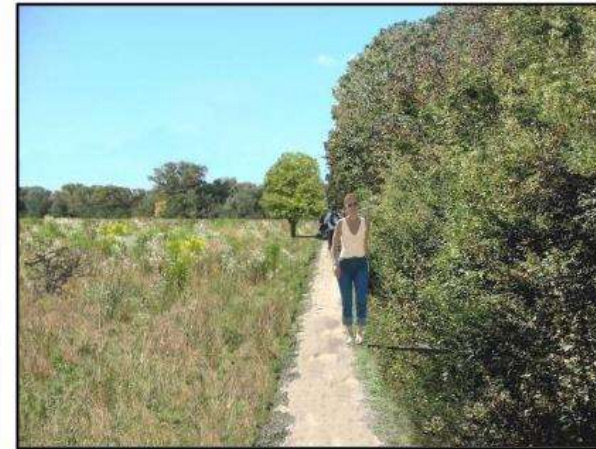

View of this water body along the way

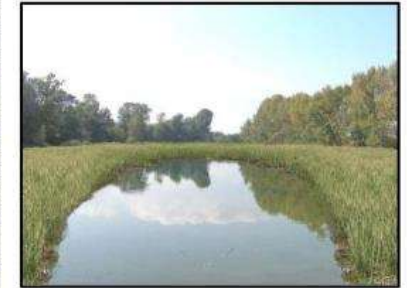

Small restaurant with beer garden

Public transport stop accessible within 10 min walking distance

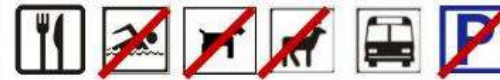

## Trail 2 (22)

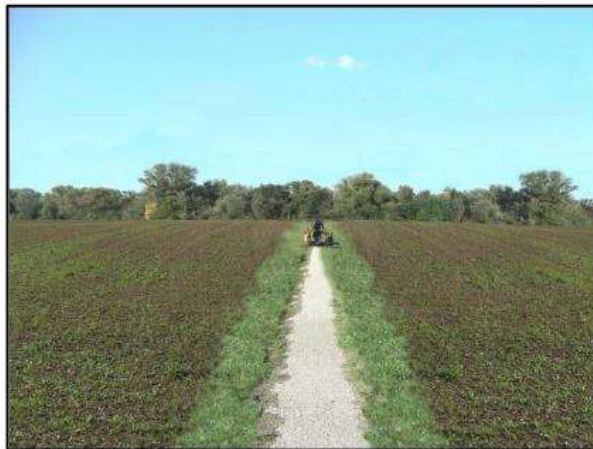

View of this water body along the way

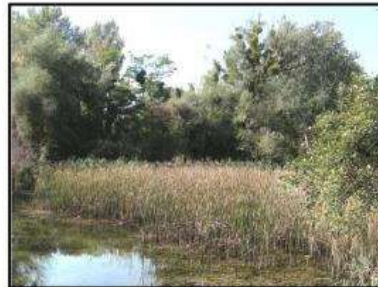

Parking lot accessible within 10 min walking distance

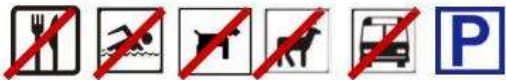

## Trail 4 (24)

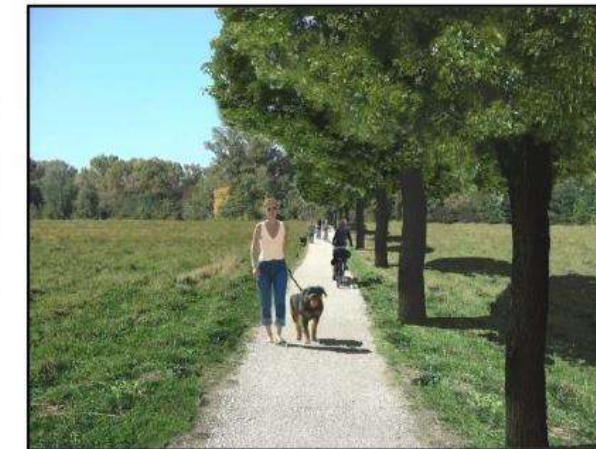

View of this water body along the way

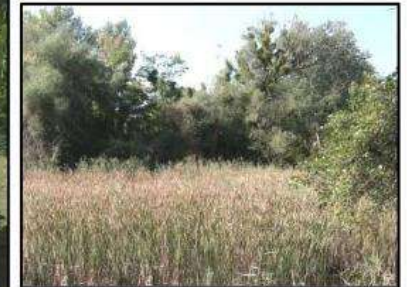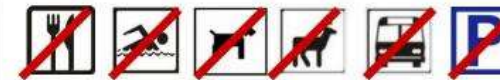



### Trail 1 (25)

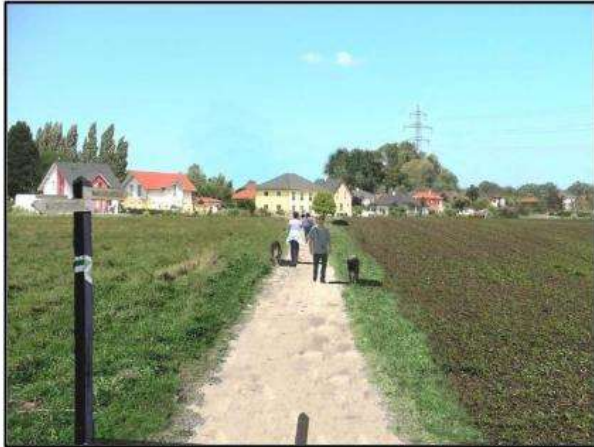

No view of water bodies  
along the way

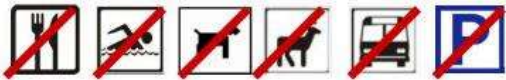

### Trail 3 (27)

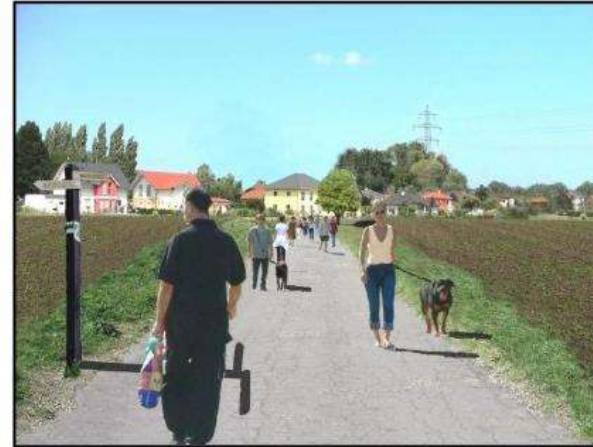

No view of water bodies  
along the way

Large dog zone with  
seating opportunities &  
drinking water

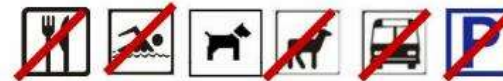

### Trail 2 (26)

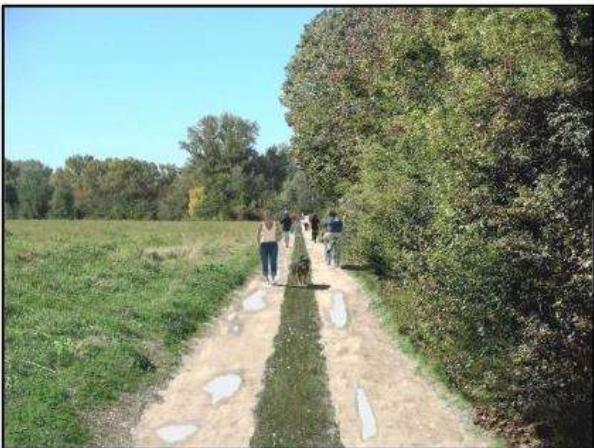

No view of water bodies  
along the way

Wildlife enclosure

Parking lot accessible  
within 10 min walking  
distance

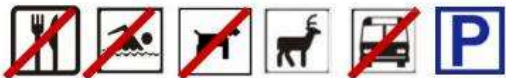

### Trail 4 (28)

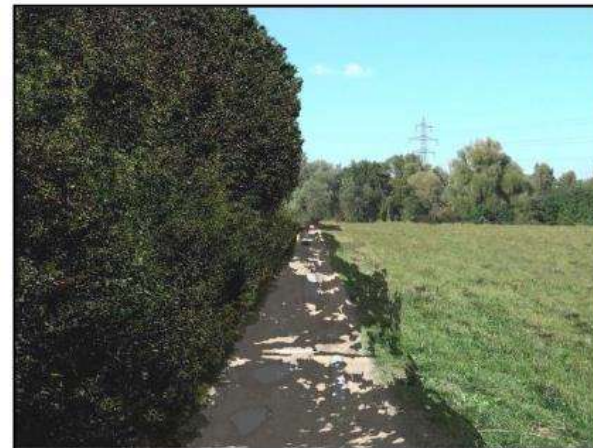

View of this water body  
along the way

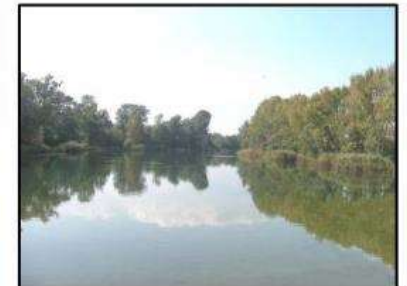

Natural swimming  
area with  
sunbathing area

Public transport stop  
accessible within  
10 min walking distance

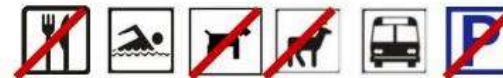



## Trail 1 (29)

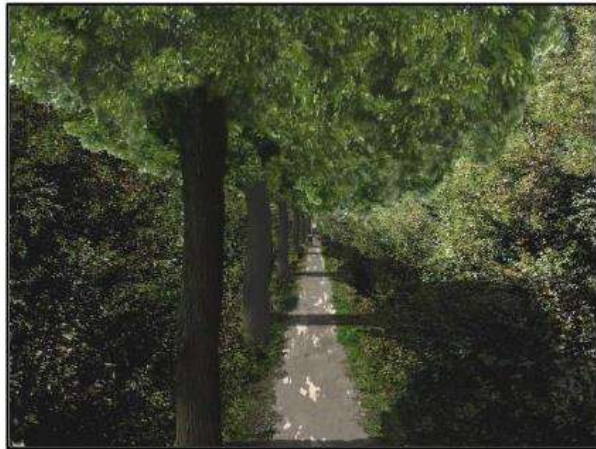

View of this water body along the way

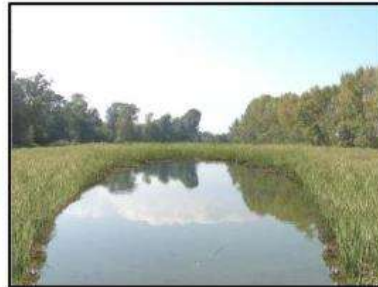

Parking lot accessible within 10 min walking distance

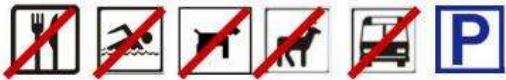

## Trail 3 (31)

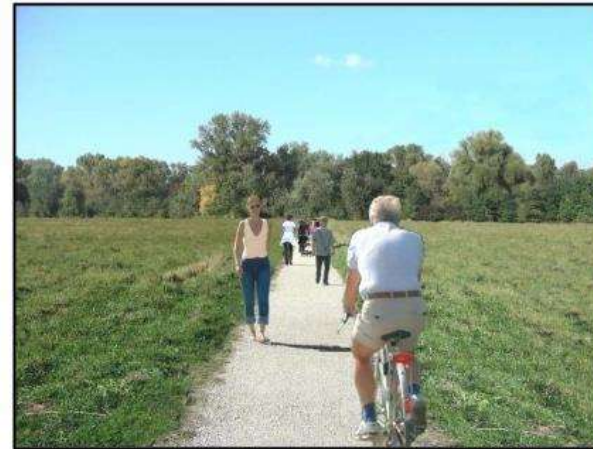

View of this water body along the way

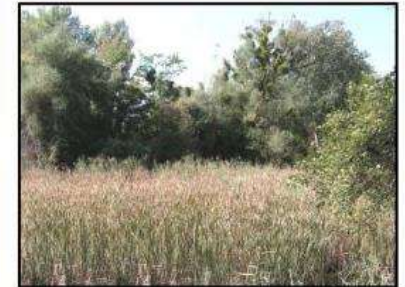

Parking lot accessible within 10 min walking distance

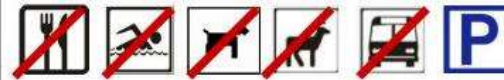

## Trail 2 (30)

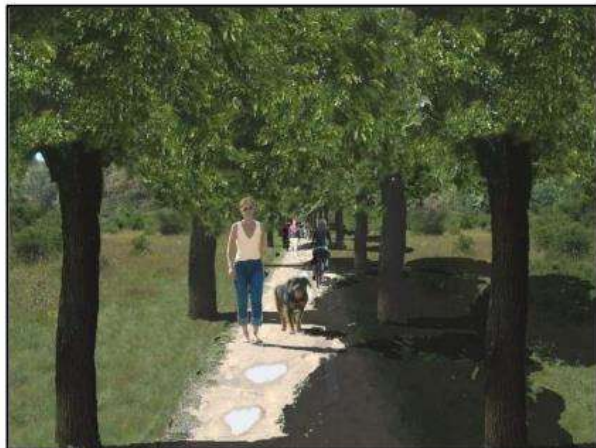

View of this water body along the way

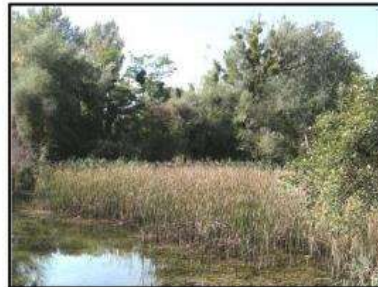

Small restaurant with beer garden

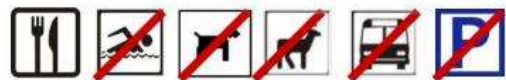

## Trail 4 (32)

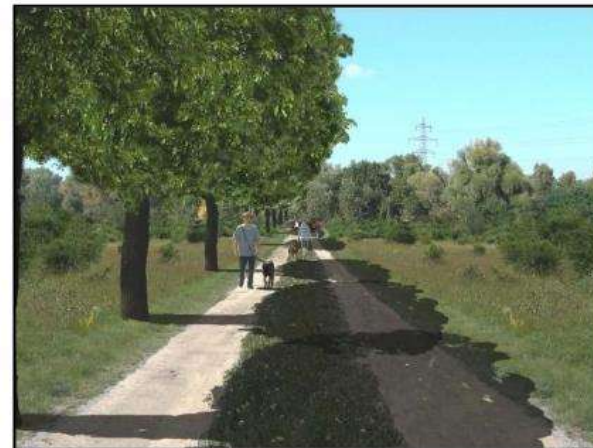

View of this water body along the way

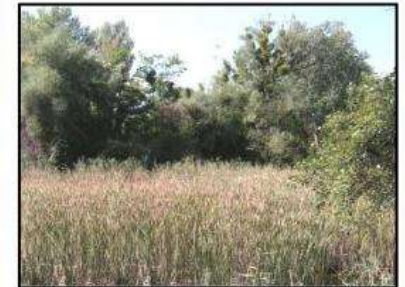

Small restaurant with beer garden

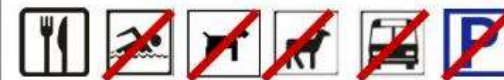



### Trail 1 (33)

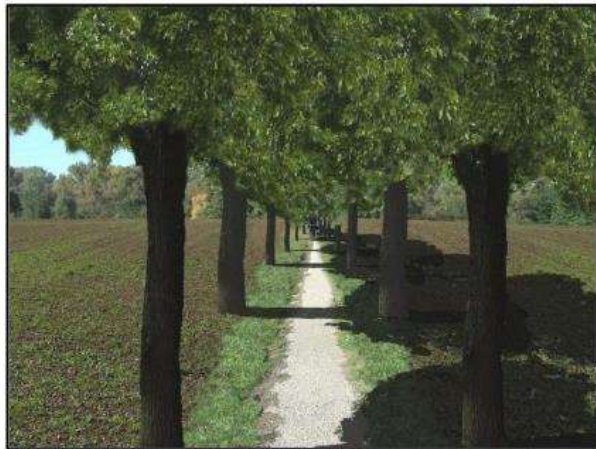

No view of water bodies  
along the way

Small restaurant with  
beer garden

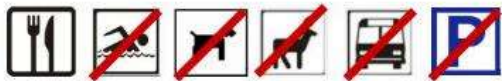

### Trail 3 (35)

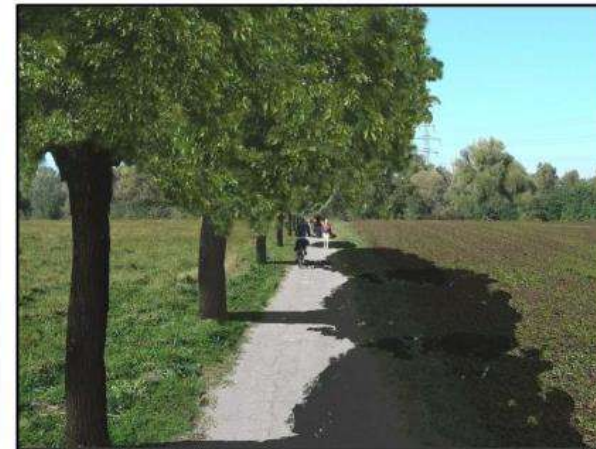

No view of water bodies  
along the way

Wildlife enclosure

Public transport stop  
accessible within  
10 min walking distance

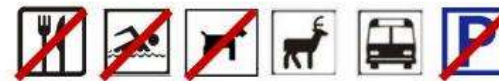

### Trail 2 (34)

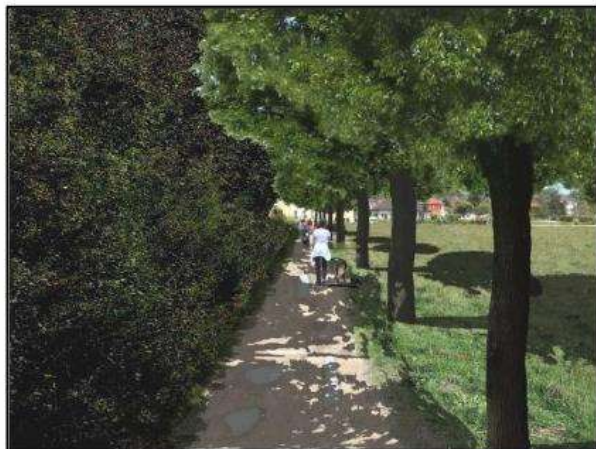

View of this water body  
along the way

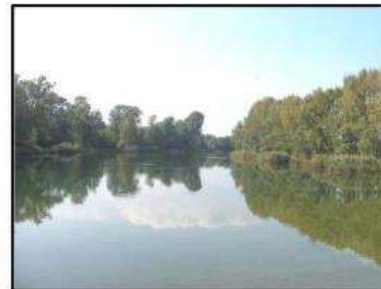

Natural swimming  
area with  
sunbathing area

Parking lot accessible  
within 10 min walking  
distance

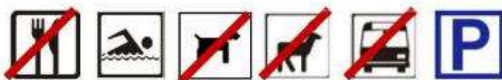

### Trail 4 (36)

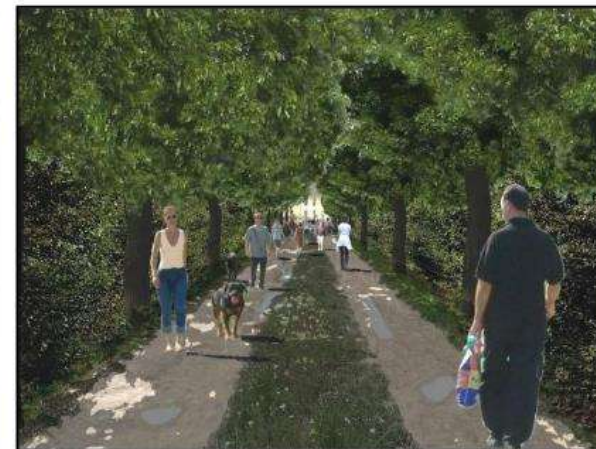

View of this water body  
along the way

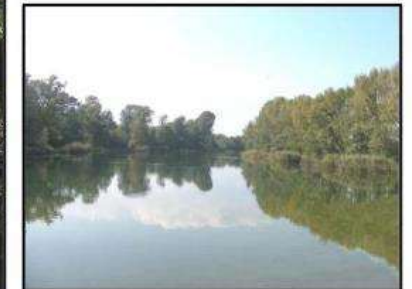

Large dog zone with  
seating opportunities &  
drinking water

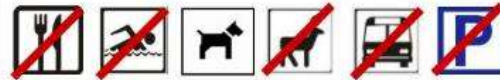



## Trail 1 (37)

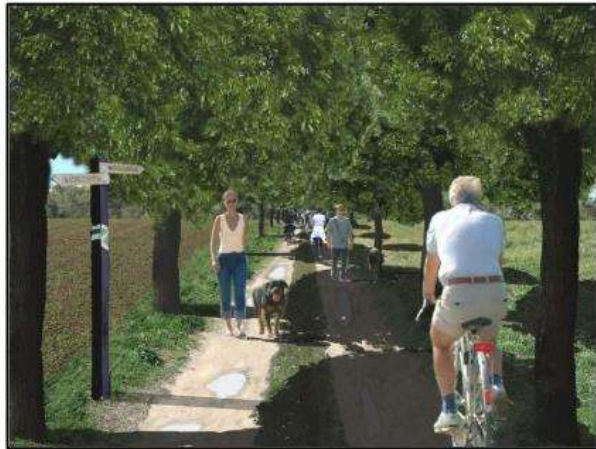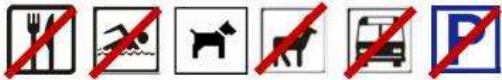

View of this water body  
along the way

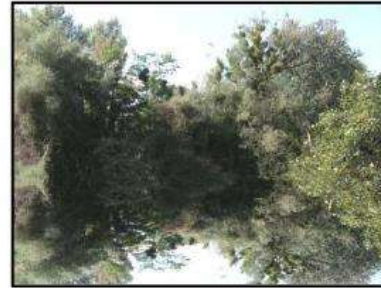

Large dog zone with  
seating opportunities &  
drinking water

## Trail 3 (39)

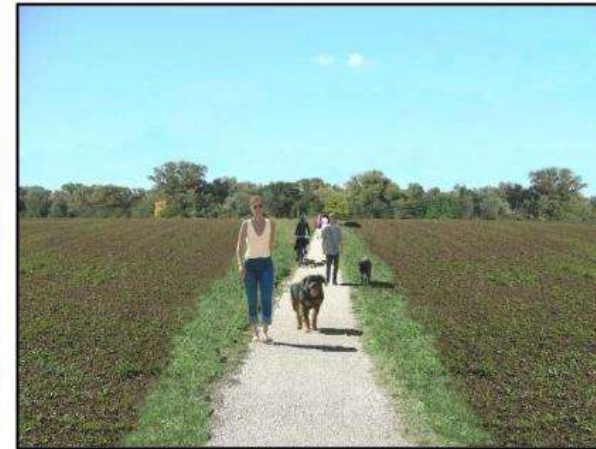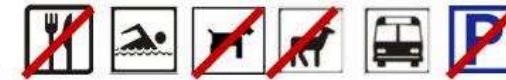

View of this water body  
along the way

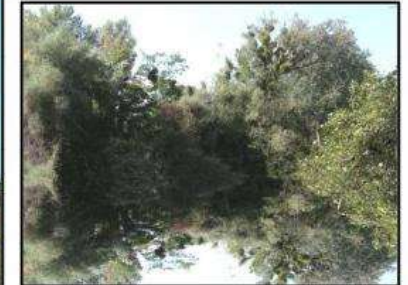

Natural swimming  
area with  
sunbathing area

Public transport stop  
accessible within  
10 min walking distance

## Trail 2 (38)

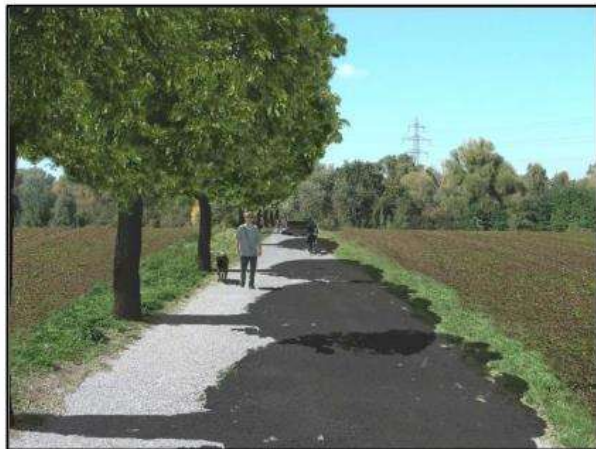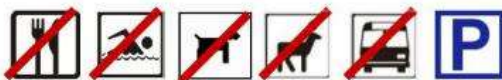

View of this water body  
along the way

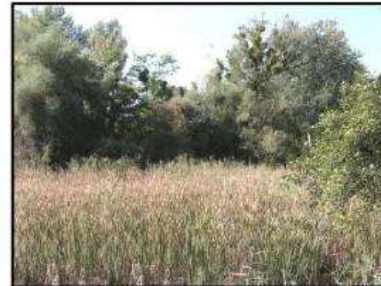

Parking lot accessible  
within 10 min walking  
distance

## Trail 4 (40)

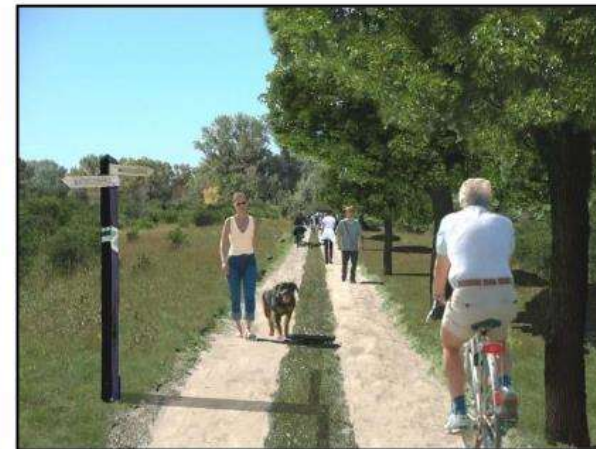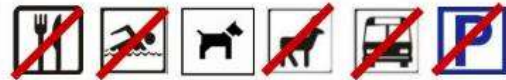

No view of water bodies  
along the way

Large dog zone with  
seating opportunities &  
drinking water



### Trail 1 (41)

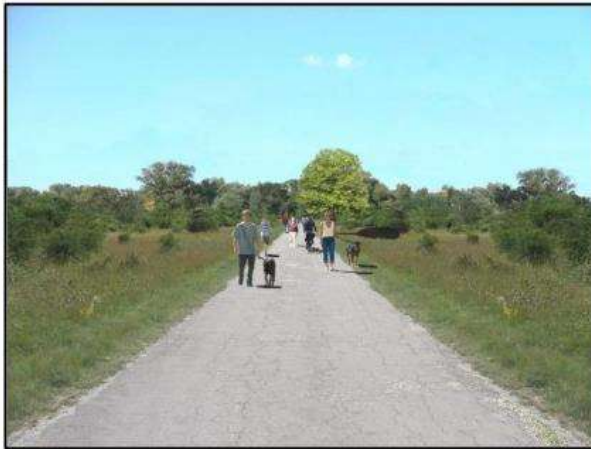

No view of water bodies  
along the way

Parking lot accessible  
within 10 min walking  
distance

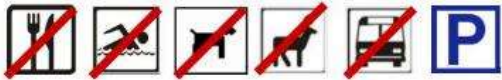

### Trail 3 (43)

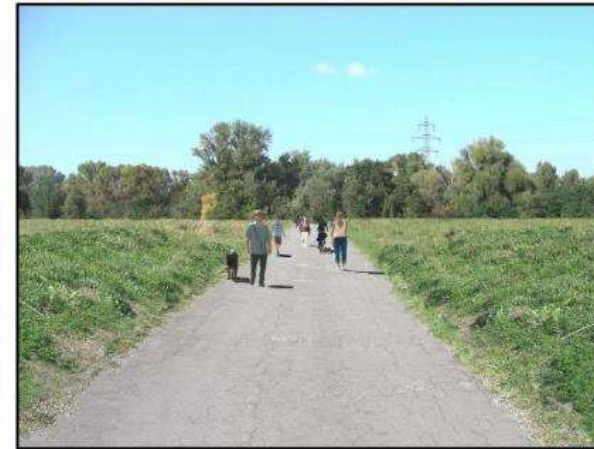

View of this water body  
along the way

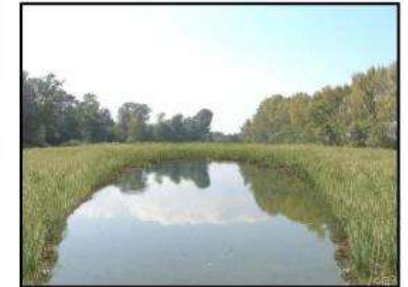

Small restaurant with  
beer garden

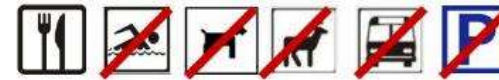

### Trail 2 (42)

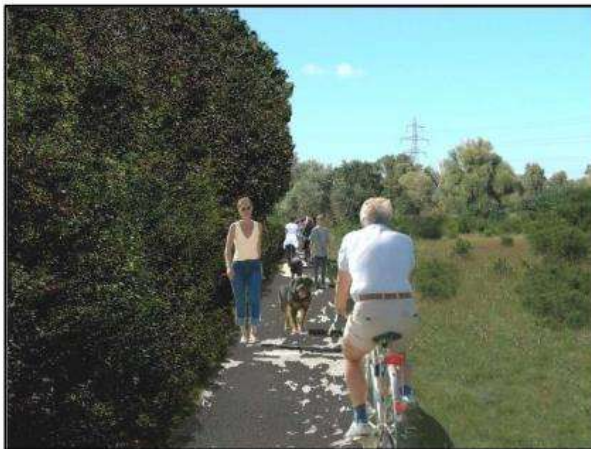

No view of water bodies  
along the way

Small restaurant with  
beer garden

Public transport stop  
accessible within  
10 min walking distance

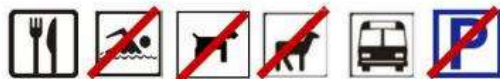

### Trail 4 (44)

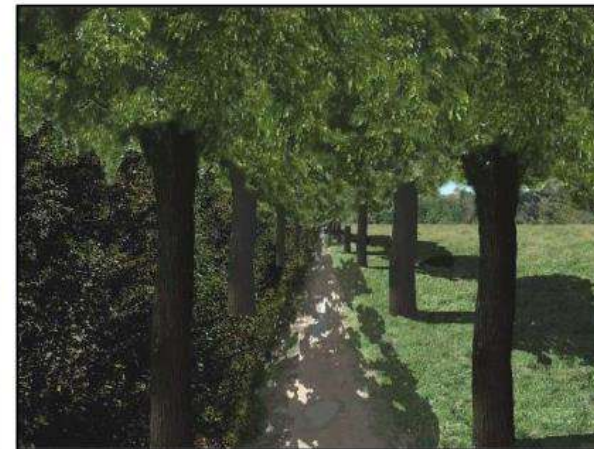

View of this water body  
along the way

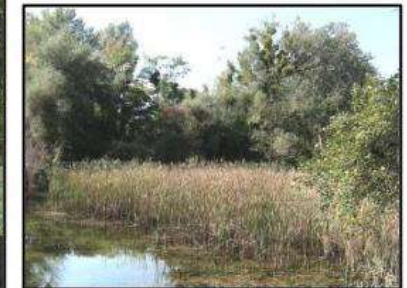

Parking lot accessible  
within 10 min walking  
distance

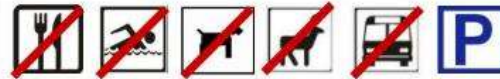



### Trail 1 (45)

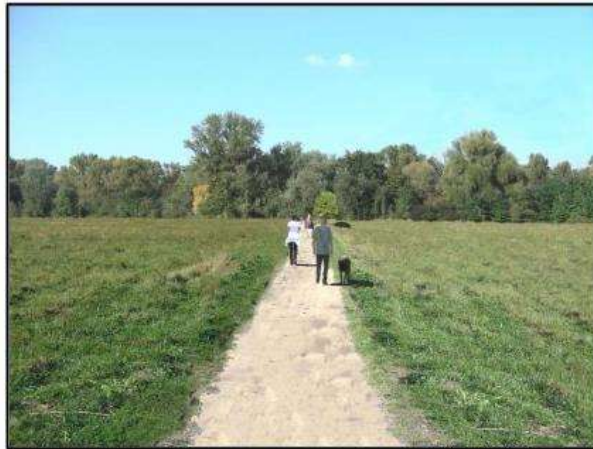

View of this water body  
along the way

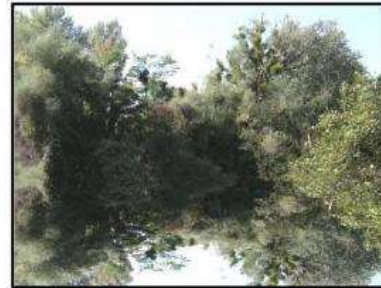

Natural swimming  
area with  
sunbathing area

Public transport stop  
accessible within  
10 min walking distance

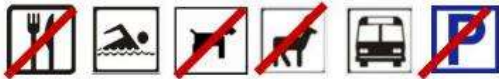

### Trail 3 (47)

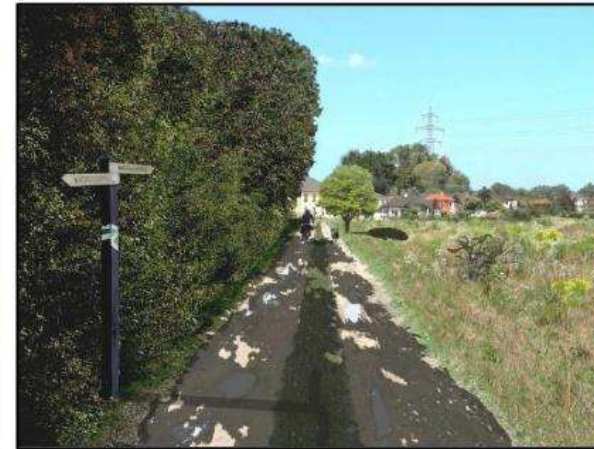

View of this water body  
along the way

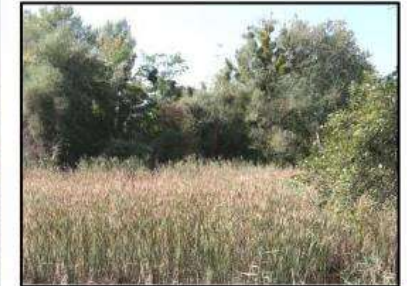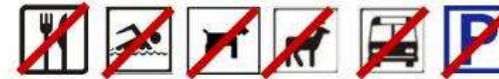

### Trail 2 (46)

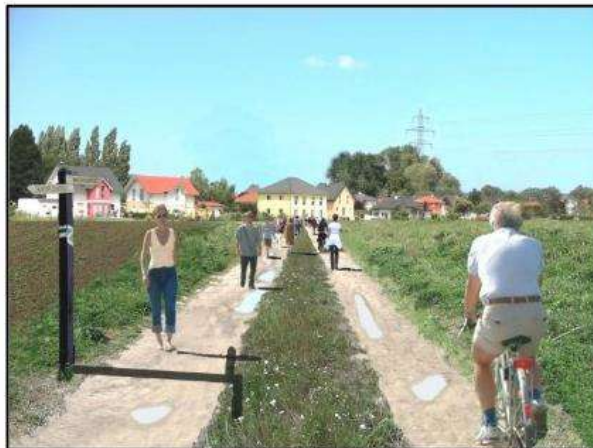

View of this water body  
along the way

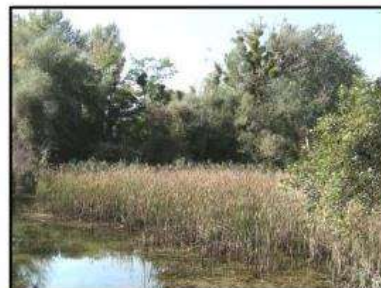

Large dog zone with  
seating opportunities &  
drinking water

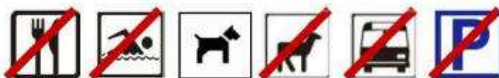

### Trail 4 (48)

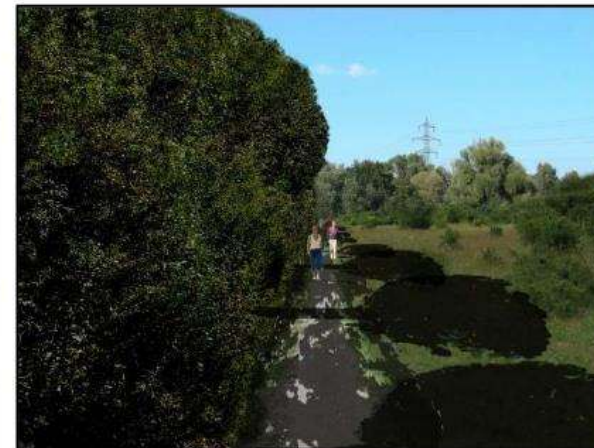

View of this water body  
along the way

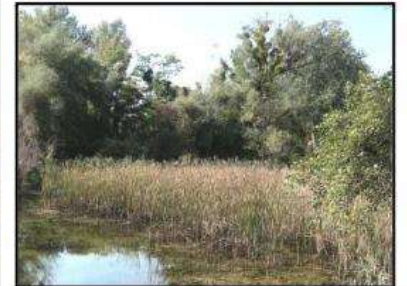

Small restaurant with  
beer garden

Parking lot accessible  
within 10 min walking  
distance

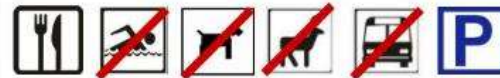

Supplement: s1 [file s1]
